# Supplementary material for: AutoImpute: Autoencoder based imputation of single-cell RNA-seq data
Source: PubMed Central journal article supplement (PMC6218547; doi:10.1038/s41598-018-34688-x), 2018-11-05
Supplement: 41598_2018_34688_MOESM1_ESM.pdf [file 41598_2018_34688_MOESM1_ESM.pdf]

# AutoImpute: Autoencoder based imputation of single-cell RNA-seq data

Supplementary Material

Divyanshu Talwar<sup>1,†</sup>, Aanchal Mongia<sup>1,†</sup>, Debarka Sengupta<sup>1,3\*</sup>, and Angshul Majumdar<sup>2</sup>

{divyanshu15028, aanchalm, debarka, angshul}@iiitd.ac.in

<sup>1</sup> Department of Computer Science and Engineering, Indraprastha Institute of Information Technology, Delhi, India.

<sup>2</sup> Department of Electronics and Communications Engineering, Indraprastha Institute of Information Technology, Delhi, India.

<sup>3</sup> Center for Computational Biology, Indraprastha Institute of Information Technology, Delhi, India.

<sup>†</sup> These authors contributed equally to this work.

<sup>\*</sup> Corresponding Author

Supplementary Table S 1: **Separation of “true zeros” from dropouts** - Fraction of zeros (values between 0 and 0.5) in single cell expression matrix against the median bulk expression. The genes are divided into 10 bins based on median bulk genes expression (first bin has only 0 expression gene).

| Median Bulk Expression Bins | Algorithms    |            |          |        |          |
|-----------------------------|---------------|------------|----------|--------|----------|
|                             | No imputation | AutoImpute | scImpute | Magic  | drImpute |
| <b>0</b>                    | 0.9471        | 0.9471     | 0.9194   | 1.0000 | 0.8585   |
| <b>0 - 1</b>                | 0.9589        | 0.9378     | 0.8945   | 1.0000 | 0.8302   |
| <b>1 - 2</b>                | 0.9298        | 0.9350     | 0.8843   | 0.9545 | 0.8343   |
| <b>2 - 3</b>                | 0.9753        | 0.9777     | 0.9537   | 1.0000 | 0.9274   |
| <b>3 - 4</b>                | 0.9507        | 0.9439     | 0.8890   | 1.0000 | 0.7778   |
| <b>4 - 6</b>                | 0.9301        | 0.8746     | 0.7644   | 0.9924 | 0.6247   |
| <b>6 - 8</b>                | 0.8253        | 0.5726     | 0.4807   | 0.8941 | 0.3253   |
| <b>8 - 10</b>               | 0.6086        | 0.2145     | 0.1665   | 0.5344 | 0.0645   |
| <b>10 - 12</b>              | 0.3675        | 0.1060     | 0.0775   | 0.1746 | 0.0120   |
| <b>12 - max</b>             | 0.1456        | 0.0480     | 0.0329   | 0.0234 | 0.0024   |

Supplementary Table S 2: **Gene expression recovery** - Comparison of NMSE, RMSE and MAE calculated between the full unmasked single cell RNA-seq data and the recovered expression matrices with masked matrices as inputs (with varying masking percentage), at the masked locations, for AutoImpute, scImpute, and Magic algorithms.

| Masking %              | NMSE                 |             |        | RMSE                  |             |          | MAE                   |             |             |
|------------------------|----------------------|-------------|--------|-----------------------|-------------|----------|-----------------------|-------------|-------------|
|                        | AutoImpute           | scImpute    | Magic  | AutoImpute            | scImpute    | Magic    | AutoImpute            | scImpute    | Magic       |
| <b>Blakeley</b>        |                      |             |        |                       |             |          |                       |             |             |
| 10                     | <b>1.80 ± 0.1270</b> | 1.4833      | 0.6173 | <b>15.34 ± 0.8754</b> | 12.3598     | 1.26E+03 | <b>12.21 ± 0.8522</b> | 9.7188      | 497.2412    |
| 20                     | <b>1.82 ± 0.2114</b> | 2.0525      | 0.5952 | <b>15.55 ± 1.7696</b> | 17.4443     | 1.42E+03 | <b>12.35 ± 1.387</b>  | 11.7828     | 520.2138    |
| 30                     | <b>1.84 ± 0.1226</b> | 2.8635      | 0.6305 | <b>15.34 ± 1.0574</b> | 24.3536     | 1.42E+03 | <b>12.37 ± 0.6635</b> | 13.1893     | 530.4287    |
| 40                     | <b>1.99 ± 0.0651</b> | 3.5833      | 0.6771 | <b>16.97 ± 0.4960</b> | 30.6860     | 1.52E+03 | <b>13.55 ± 0.3941</b> | 13.1764     | 539.3752    |
| 50                     | <b>2.22 ± 0.0350</b> | 12.4788     | 0.7338 | <b>18.86 ± 0.3273</b> | 105.8491    | 1.73E+03 | <b>15.01 ± 0.2601</b> | 24.1704     | 575.0085    |
| <b>Jurkat-293T</b>     |                      |             |        |                       |             |          |                       |             |             |
| 10                     | <b>0.39 ± 0.0143</b> | 2.0607      | 0.5239 | <b>1.09 ± 0.0402</b>  | 3.5464      | 3.2438   | <b>0.96 ± 0.0382</b>  | 0.3870      | 0.4744      |
| 20                     | <b>0.40 ± 0.0377</b> | 5.6608      | 0.5825 | <b>1.19 ± 0.1063</b>  | 9.1853      | 3.4002   | <b>1.04 ± 0.0508</b>  | 0.8851      | 0.4848      |
| 30                     | <b>0.44 ± 0.0895</b> | 13.6579     | 0.6332 | <b>1.25 ± 0.0500</b>  | 20.7366     | 3.4586   | <b>1.34 ± 0.2031</b>  | 1.7311      | 0.4855      |
| 40                     | <b>0.48 ± 0.5047</b> | 54.4675     | 0.6791 | <b>1.41 ± 0.4410</b>  | 76.5812     | 3.4294   | <b>1.12 ± 0.6816</b>  | 3.9182      | 0.4728      |
| 50                     | <b>0.49 ± 0.6816</b> | 449.9235    | 0.7199 | <b>1.63 ± 0.6029</b>  | 577.3294    | 3.3262   | <b>1.79 ± 0.9975</b>  | 10.9636     | 0.4441      |
| <b>Kolodziejczyk</b>   |                      |             |        |                       |             |          |                       |             |             |
| 10                     | <b>2.82 ± 0.0127</b> | 1.6747      | 0.3711 | <b>25.13 ± 0.1063</b> | 14.9218     | 1.23E+03 | <b>20.04 ± 0.0916</b> | 9.4494      | 192.2411    |
| 20                     | <b>3.14 ± 0.0221</b> | 3.0888      | 0.4597 | <b>27.92 ± 0.2057</b> | 27.4045     | 1.58E+03 | <b>22.24 ± 0.1613</b> | 13.011      | 203.654     |
| 30                     | <b>3.39 ± 0.0177</b> | 6.1239      | 0.5940 | <b>30.21 ± 0.1418</b> | 54.4813     | 1.86E+03 | <b>24.09 ± 0.1347</b> | 19.0343     | 221.3524    |
| 40                     | <b>3.62 ± 0.0020</b> | 13.4705     | 0.6770 | <b>32.22 ± 0.0300</b> | 119.9824    | 2.20E+03 | <b>25.66 ± 0.0297</b> | 29.8625     | 238.5226    |
| 50                     | <b>3.87 ± 0.0043</b> | 90.4541     | 0.7238 | <b>34.40 ± 0.0502</b> | 803.8800    | 2.23E+03 | <b>27.43 ± 0.0500</b> | 69.1118     | 257.9593    |
| <b>Quake</b>           |                      |             |        |                       |             |          |                       |             |             |
| 10                     | <b>0.95 ± 0.0007</b> | 24.82263737 | 0.7731 | <b>8.51 ± 0.0705</b>  | 2.23E+02    | 8.38E+03 | <b>6.78 ± 0.0268</b>  | 63.44775511 | 2013.0823   |
| 20                     | <b>0.99 ± 0.0017</b> | 1.29E+02    | 0.8031 | <b>8.89 ± 0.0238</b>  | 1.15E+03    | 8.14E+03 | <b>7.08 ± 0.0195</b>  | 1.25E+02    | 1978.092744 |
| 30                     | <b>1.02 ± 0.0013</b> | 6.06E+02    | 0.8426 | <b>9.18 ± 0.0144</b>  | 5.43E+03    | 8.52E+03 | <b>7.30 ± 0.0159</b>  | 3.63E+02    | 1998.363221 |
| 40                     | <b>1.07 ± 0.0008</b> | 3.13E+03    | 0.8865 | <b>9.56 ± 0.0157</b>  | 2.80E+04    | 9.46E+03 | <b>7.60 ± 0.0044</b>  | 1.24E+03    | 2011.990659 |
| 50                     | <b>1.10 ± 0.0015</b> | 2.18E+06    | 0.9075 | <b>9.85 ± 0.0013</b>  | 1.95E+07    | 9.68E+03 | <b>7.83 ± 0.0049</b>  | 1.35E+05    | 2026.776616 |
| <b>Preimplantation</b> |                      |             |        |                       |             |          |                       |             |             |
| 10                     | <b>0.29 ± 0.0094</b> | 1.6424      | 0.777  | <b>2.42 ± 0.0888</b>  | 6.8395      | 1.71E+03 | <b>1.90 ± 0.9902</b>  | 0.7164      | 286.8199    |
| 20                     | <b>0.29 ± 0.0057</b> | 6.6387      | 0.8052 | <b>2.42 ± 0.0451</b>  | 26.0432     | 1.85E+03 | <b>1.85 ± 0.0661</b>  | 2.0347      | 313.6260    |
| 30                     | <b>0.31 ± 0.1280</b> | 54.469      | 0.8277 | <b>2.57 ± 0.1050</b>  | 200.0148    | 1.96E+03 | <b>1.91 ± 0.1550</b>  | 6.2662      | 330.6937    |
| 40                     | <b>0.31 ± 0.0180</b> | 120.2089    | 0.8501 | <b>2.58 ± 0.1530</b>  | 408.693     | 2.00E+03 | <b>2.04 ± 0.1256</b>  | 13.8265     | 341.3199    |
| 50                     | <b>0.31 ± 0.014</b>  | 1.21E+04    | 0.8672 | <b>2.60 ± 0.1200</b>  | 3.77E+04    | 2.08E+03 | <b>2.24 ± 0.1341</b>  | 6.2662      | 344.7977    |
| <b>Usoskin</b>         |                      |             |        |                       |             |          |                       |             |             |
| 10                     | <b>2.23 ± 0.0182</b> | 41.22689    | 0.6443 | <b>9.69 ± 0.0564</b>  | 1.60E+02    | 52.5217  | <b>7.69 ± 0.0256</b>  | 24.81428717 | 14.1806     |
| 20                     | <b>2.40 ± 0.0022</b> | 3.18E+03    | 0.6720 | <b>10.40 ± 0.0411</b> | 1.30E+04    | 55.2395  | <b>8.26 ± 0.0310</b>  | 1.83E+02    | 14.7904     |
| 30                     | <b>2.53 ± 0.0121</b> | 3.96E+07    | 0.7645 | <b>10.95 ± 0.0325</b> | 1.67E+08    | 68.8496  | <b>8.72 ± 0.0293</b>  | 8.18E+05    | 15.2874     |
| 40                     | <b>2.63 ± 0.0119</b> | 8.06E+05    | 0.7696 | <b>11.37 ± 0.0439</b> | 3.42E+06    | 66.2696  | <b>9.05 ± 0.0444</b>  | 1.56E+04    | 15.8968     |
| 50                     | <b>2.75 ± 0.0764</b> | 2.56E+06    | 0.8590 | <b>11.93 ± 0.0586</b> | 1.09E+07    | 84.2230  | <b>9.50 ± 0.0514</b>  | 5.70E+04    | 17.0062     |
| <b>Zeisel</b>          |                      |             |        |                       |             |          |                       |             |             |
| 10                     | <b>1.42 ± 0.0077</b> | 19.3472739  | 0.9038 | <b>4.23 ± 0.0238</b>  | 57.51650418 | 1.68E+01 | <b>3.07 ± 0.0326</b>  | 13.02629774 | 1.9248      |
| 20                     | <b>1.77 ± 0.0028</b> | 51.45857788 | 0.926  | <b>5.25 ± 0.0162</b>  | 152.4683696 | 1.72E+01 | <b>4.05 ± 0.0134</b>  | 23.33065176 | 2.0222      |
| 30                     | <b>1.99 ± 0.0095</b> | 1025.814158 | 0.9409 | <b>5.91 ± 0.0377</b>  | 3043.370528 | 1.79E+01 | <b>4.63 ± 0.0320</b>  | 76.24520225 | 2.1272      |
| 40                     | <b>2.20 ± 0.0008</b> | 12127.06557 | 0.9554 | <b>6.52 ± 0.0024</b>  | 35970.72819 | 1.81E+01 | <b>5.14 ± 0.0023</b>  | 324.6180099 | 2.2441      |
| 50                     | <b>2.34 ± 0.0235</b> | 48999902.91 | 0.9612 | <b>6.96 ± 0.0670</b>  | 1.45E+08    | 1.73E+01 | <b>5.49 ± 0.0553</b>  | 288527.3319 | 2.364       |

Supplementary Table S 3: **Median of coefficient of variation** across cells from a random subpopulation selected from each dataset imputed using the following algorithms.

| Datasets        | No Imputation | scImpute | drImpute | Magic    | AutoImpute |
|-----------------|---------------|----------|----------|----------|------------|
| Blakeley        | 3.3114        | 2.1918   | 2.4142   | 3.35E-06 | 2.7507     |
| Jurkat-293T     | 2.8399        | 12.0685  | 1.9193   | 0.031    | 0.0164     |
| Kolodziejczyk   | 78.0416       | 14.5777  | 10.127   | 0.2526   | 4.6243     |
| PBMC            | 58.3697       | –        | –        | –        | 0.0011     |
| Preimplantation | 6.6962        | 5.0814   | 4.1446   | 0.0595   | 0.0012     |
| Quake           | 11.5473       | 6.4453   | 4.0275   | 0.0106   | 8.8568     |
| Usoskin         | 28.9626       | 14.4071  | 27.7187  | 0.2375   | 10.9204    |
| Zeisel          | 32.4045       | 4.891    | 1.8093   | 0.0728   | 11.0032    |

Supplementary Table S 4: **Average silhouette index values** showing cell-type separability on cell groupings corresponding to first two principal components of expressions.

| Datasets        | No Imputation | scImpute | drImpute | Magic | AutoImpute |
|-----------------|---------------|----------|----------|-------|------------|
| Blakeley        | 0.93          | 0.67     | 0.44     | 0.20  | 0.87       |
| Jurkat-293T     | 0.94          | 0.93     | 0.70     | 0.90  | 0.96       |
| Kolodziejczyk   | 0.24          | 0.46     | 0.43     | -0.18 | 0.37       |
| Preimplantation | -0.007        | -0.06    | 0.03     | 0.01  | 0.08       |
| Quake           | -0.26         | 0.36     | 0.32     | -0.03 | 0.33       |
| Usoskin         | 0.33          | 0.12     | -0.13    | -0.08 | 0.36       |
| Zeisel          | -0.14         | 0.19     | 0.08     | -0.16 | 0.34       |
